# Supplementary material
Source: publisher figshare collection journal article supplement (https://rs.figshare.com/ndownloader/files/23389415)
Supplement: Supplementary file 1 [file 23389415]

**SUPPLEMENTARY INFORMATION: THE  
GODBILLON-VEY INVARIANT AS TOPOLOGICAL  
VORTICITY COMPRESSION AND OBSTRUCTION TO  
STEADY FLOW IN IDEAL FLUIDS**

THOMAS MACHON

1. APPENDIX I

We consider the invariance of helicity

$$(1) \quad H = \int_{\Omega} \theta \wedge d\theta,$$

under an arbitrary transformation,  $\theta \rightarrow \theta + \beta$ , where  $\beta$  is a closed 1-form. Then the helicity integral gives a boundary term

$$(2) \quad H \rightarrow \int_{\Omega} \theta \wedge d\theta + \int_{\partial\Omega} \theta \wedge \beta,$$

which in general does not vanish. By construction,  $d\theta|_{\partial\Omega} = 0$ , hence  $\theta|_{\partial\Omega}$  is a closed 1-form on  $\partial\Omega$  and defines a de Rahm cohomology class  $[\theta] \in H^1(\partial\Omega; \mathbb{R})$ . Restriction to the boundary defines a map  $r : H^1(\Omega; \mathbb{R}) \rightarrow H^1(\partial\Omega; \mathbb{R})$ .  $d\theta$  is fluxless if  $[\theta] = 0 \in H^1(\partial\Omega; \mathbb{R})/\text{Im}(r)$ . This condition is equivalent to the statement that

$$(3) \quad \int_S d\theta = 0,$$

for any surface  $S \subset \Omega$ , with  $\partial S \subset \partial\Omega$ .

2. APPENDIX II

We start with the definition

$$(4) \quad H = \frac{1}{U \cdot A} \omega \times U = \beta \omega \times U.$$

Then we assert that

$$(5) \quad (\partial_t + \mathcal{L}_U)H = fA,$$

where  $f$  is to be determined. Using coordinate notation (recall we are in Euclidean space, so that we do not distinguish covariant and contravariant indices), we have

$$(6) \quad fA_i = \partial_t H_i + U_j \partial_j H_i + U_j \partial_i H_j.$$

Now by construction we have  $U_i H_i = 0$ , so this is rewritten as

$$(7) \quad fA_i = \partial_t H_i + U_j \partial_j H_i - H_j \partial_i U_j,$$

or

$$(8) \quad fA = \partial_t H - U \times \nabla \times H.$$

Expanding we find

$$(9) \quad fA = (\partial_t \beta) \omega \times U + \beta (\partial_t \omega) \times U + \beta \omega \times (\partial_t U) - U \times (\nabla \beta \times (\omega \times U)) + \beta U \times (\partial_t \omega),$$

(recall  $\beta = (U \cdot A)^{-1}$ ) which becomes

$$(10) \quad fA = ((\partial_t + U \cdot \nabla) \beta) \omega \times U + \beta \omega \times (\partial_t U).$$

Now, using the fact that

$$(11) \quad (\partial_t + U \cdot \nabla) A + (\nabla A) \cdot U = 0,$$

we find

$$(12) \quad ((\partial_t + U \cdot \nabla) \beta) = \beta (H \cdot A + \beta A \cdot \nabla (P + U^2/2)).$$

So we get

$$(13) \quad fA = ((h \cdot A) + \beta A \cdot \nabla (P + U^2/2)) H - \beta \omega \times \nabla (P + U^2/2) - \beta \omega \times (\omega \times U).$$

Then we find

$$(14) \quad fA = (H^2 + \beta H \cdot \nabla (P + U^2/2)) A,$$

so we may identify

$$(15) \quad f = H^2 + \beta H \cdot \nabla (P + U^2/2).$$
